# Supplementary material for: Mediterranean Diet Combined With a Low-Carbohydrate Dietary Pattern in the Treatment of Overweight Polycystic Ovary Syndrome Patients
Source: Front Nutr. 2022 Apr 4;9:876620. doi: 10.3389/fnut.2022.876620 (PMC9014200; doi:10.3389/fnut.2022.876620)
Supplement: Supplementary file 1 [file Data_Sheet_1.xlsx]

## Sheet: Supplementary Table 1-LF 
LFday1		Breakfast			Lunch				Dinner				Fill in the afternoon		Total
		Sandwich100g	skimmed milk200ml		Hand-Pulled Noodle Soup with Beef400g	Celery Fried meat200g	Black fungus in cold sauce100g		Whole grain porridge250g	Stir-fried broccoli150g			sugar-free yogurt100g
	Total Energy(Kcal)	196.85	70.74	267.59	341.56	213.28	51.32		102.175	76.68			55		1375.19
	Carbohydrate(g)	20	10.2		52	8.76	7.78		20.75	8.355			4		131.845
	Protein(g)	10.6	7.2		16.12	18.83	1.6		4.25	5.205			2.7		66.505
	Fat(g)	12.74	0		6.64	11.78	1.03		0	1.41			0		33.6
	saturated fatty acids(g)	2.66	0		2.76	0	0		0	0			0		5.42
	cholesterol(mg)	130.72	0		23.56	73.64	0		0	0			0		227.92
LFday2		one tea egg	Corn steamed bread1个	skimmed milk200ml	green pepper and shredded potato250g	rice200g	Steamed crucian carp 100g		Vegetarian dumplings100g	tomato soup250g			cucumber150g
	Total Energy(Kcal)	70.13	161.255	70.74	216.225	232	144.615		172.46	57.14			24		1148.57
	Carbohydrate(g)	3.655	24.58	10.2	29.875	51.8	4.17		21.81	5.94			4.35		156.38
	Protein(g)	6.15	4.73	7.2	4.575	5.2	17.445		6.17	1.946			1.2		54.616
	Fat(g)	3.72	0.74	0	9.7	0.6	6.495		3.71	3.1			0.3		28.365
	saturated fatty acids(g)	1.935	0.245	0	0	0	0.9		0.47	0			0		3.55
	cholesterol(mg)	272.84	0	0	0	0	109.95		0	0			0		382.79
LFday3		Corn steamed dumpling50g	Sugar-free soybean milk300g		Scrambled eggs with cucumber and ham300g	rice200g	spinach with mashed garlic200g		Yogurt oats200g	Needle Mushroom with Sauce150g			Six cherry tomatoes
	Total Energy(Kcal)	92.05	90	182.05	347.82	232	93.94		150	107.745			25		1320.61
	Carbohydrate(g)	14.835	7.89		8.64	51.8	10.66		33.6	13.605			5.8		146.83
	Protein(g)	4.45	8.07		17.67	5.2	4.56		0	3.87			1		44.82
	Fat(g)	1.74	3.69		25.12	0.6	5.24		0	1.665			0.2		38.255
	saturated fatty acids(g)	0.105	0.54		6.96	0	0		0	0			0		7.605
	cholesterol(mg)	5.75	0		385.01	0	0		0	0			0		390.76
LFday4		small steamed twisted roll80g	skimmed milk200ml		Pan-seared chicken breast300g	rice200g	Garlic and oilseed dish200g		Red bean and barley porridge250g	cucumber in sauce100g			kiwi fruit70g
	Total Energy(Kcal)	170.12	70.74	240.86	310.73	232	91.48		194.05	41.73			42.7		1394.41
	Carbohydrate(g)	36.48	10.2		3.54	51.8	4.5		38.05	3.86			10.15		158.58
	Protein(g)	5.12	7.2		71.64	5.2	2.88		10.225	1.06			0.56		103.885
	Fat(g)	0.8	0		5.55	0.6	6.96		0.875	2.53			0.42		17.735
	saturated fatty acids(g)	0	0		2.88	0	1.1		0.05	0			0		4.03
	cholesterol(mg)	0	0		188.1	0	0		0	0			0		188.1
LFday5		millet congee200g	one boiled egg		rice200g	gulash250g	Garlic spinach200g		Steamed sweet potatoes200g	Fried carrot150g			An apple
	Total Energy(Kcal)	92	85.8	177.8	232	360.5	87.18		156.36	86.7			53		1331.34
	Carbohydrate(g)	16.8	0.08		51.8	2.875	10.7		36.58	11.505			13.7		144.04
	Protein(g)	2.8	9.68		5.2	41.3	5.26		2.86	1.605			0.4		69.105
	Fat(g)	1.4	8.4		0.6	20.55	3.26		0.18	3.18			0.2		37.77
	saturated fatty acids(g)	0	0		0	5.625	0		0	0			0		5.625
	cholesterol(mg)	0	0		0	153.9	0		0	0			0		153.9
LFday6		Grains steamed corn-bread1个	skimmed milk200ml		rice200g	steamed fish300g	Scrambled eggs with green pepper150g		Steamed purple potato150g	Salad celery150g			watermelon200g
	Total Energy(Kcal)	114.4	70.74	185.14	232	277.38	143.34		199.5	48.69			62		1333.19
	Carbohydrate(g)	25.912	10.2		51.8	3.3	5.97		42.55	2.85			13.6		156.182
	Protein(g)	2.632	7.2		5.2	53.04	57.78		1.8	2.1			1		130.752
	Fat(g)	0.416	0		0.6	6.06	9.405		0.45	3.51			0.6		21.041
	saturated fatty acids(g)	0.08	0		0	1.44	3.105		0.075	0			0		4.7
	cholesterol(mg)	0	0		0	246.18	437.835		0	0			0		684.015
LFday7		Skim milk oats200g	one boiled egg		Hand-Pulled Noodle Soup with Beef400g	Chicken breast with green pepper250g	Stir-fried chicken and cabbage200g		maize150g	seaweed soup200g			A banana
	Total Energy(Kcal)	138.05	85.8	223.85	341.56	238.3	82.46		168	42.82			93		1413.84
	Carbohydrate(g)	28.275	0.08		52	7.8	8.02		34.2	5.58			22		157.955
	Protein(g)	6.435	9.68		16.12	19.3	6.1		6	5.34			1.4		70.375
	Fat(g)	0.3	8.4		6.64	13.75	4.08		1.8	0.34			0.2		35.51
	saturated fatty acids(g)	0	0		2.76	2.525	0.04		0	0.08			0		5.405
	cholesterol(mg)	0	0		23.56	72.7	0.4		0	38.56			0		135.22
