# Supplementary material for: Mediterranean Diet Combined With a Low-Carbohydrate Dietary Pattern in the Treatment of Overweight Polycystic Ovary Syndrome Patients
Source: Front Nutr. 2022 Apr 4;9:876620. doi: 10.3389/fnut.2022.876620 (PMC9014200; doi:10.3389/fnut.2022.876620)
Supplement: Supplementary file 2 [file Data_Sheet_2.xlsx]

## Sheet: Supplementary Table 2-MED LC 
MED/LCday1		Breakfast			Lunch				Dinner					Fill in the afternoon		Total
		Pan-fried longley fish200g	sugar-free yoghurt200ml		soba noodles200g	Chicken breast with green pepper200g	spinach with mashed garlic200g		fried shrimps with cashew nuts200g	Fry lettuces200g	A guava			peanut kernel20g
	Total Energy(Kcal)	192.18	114		259.62	190.64	93.94		299.02	83.6	33			62.6		1328.6
	Carbohydrate(g)	1.86	10.6		39.92	6.24	8.34		18.4	3.36	9.9			1.2		99.82
	Protein(g)	32.22	6.6		11.66	15.44	4.56		19.82	2.62	0.6			2.4		95.92
	Fat(g)	6.22	0.8		6.58	11	5.24		15.12	7.12	0			5.08		57.16
	saturated fatty acids(g)	0	0.4		0.96	2.02	0		0.56	0	0			0.96		4.9
	cholesterol(mg)	0	36		135	58.16	0		226.78	0	0			0		455.94
MED/LCday2		graham bread60g	sugar-free yoghurt200ml	One boiled egg	purple rice porridge250g	steamed perch with scallion and black beans300g	Stir-fried celery200g		Pan-seared chicken breast200g	Fried baby food200g	pawpaw200g			sunflower seed20g
	Total Energy(Kcal)	152.4	114	85.8	162.575	293.88	88.48		233.92	72	60			67.79		1330.85
	Carbohydrate(g)	25.86	10.6	0.08	35.175	2.34	9		2.34	2.28	7.2			1.506		96.381
	Protein(g)	7.38	6.6	9.68	3.7	50.52	2.46		47.76	5.42	1.2			2.26		136.98
	Fat(g)	2.13	0.8	8.4	0.475	10.21	5.98		4.7	6.38	0			6.65		45.725
	saturated fatty acids(g)	0.438	0.4	0	0	3.16	0.56		1.92	0	0			0.745		7.223
	cholesterol(mg)	0	36	0	0	231.03	0		125.4	0	0			0		392.43
MED/LCday3		eddoes 150g	Sugar-free soybean milk400ml		millet congee250g	Steamed yellow croaker300g	Mushroom west blue flower200g		Smoked chicken breast200g	cucumber in sauce200g	strawberry150g			almond20g
	Total Energy(Kcal)	94	120		135	412.11	100		244	83.46	48			115		1351.57
	Carbohydrate(g)	18.45	10.4		21	6.48	9.08		2.6	7.72	10.5			4.78		91.01
	Protein(g)	1.95	11.6		3.5	44.46	6.44		51.2	2.12	1.5			4.5		127.27
	Fat(g)	0.3	1.92		1.75	22.47	5.44		4.8	5.06	0.3			9.08		51.12
	saturated fatty acids(g)	0	0.72		0	1.71	0		0	0	0			0		2.43
	cholesterol(mg)	0	0		0	209.88	2.82		0	0	0			0		212.7
MED/LCday4		graham bread60g	Sugar-free soybean milk400ml		soba noodles200g	Sauteed shrimps with celery300g	Fried cabbage200g		Steamed cod pieces400g	Fried small green vegetables200g	muskmelon200g			walnut kernel20g
	Total Energy(Kcal)	152.4	120		259.62	186	90.34		378.48	71.76	52			129.2		1439.8
	Carbohydrate(g)	25.86	10.4		39.92	9.36	8.92		4.8	5.6	10.4			3.12		118.38
	Protein(g)	7.38	11.6		11.66	10.98	3.62		64.44	2.98	0.8			3		116.46
	Fat(g)	2.13	1.92		6.58	10.29	5.14		11	3.72	0.2			12.76		53.74
	saturated fatty acids(g)	0.438	0.72		0.96	0	0		0.32	0	0			0.96		3.398
	cholesterol(mg)	0	0		135	0	0		350.76	0	0			0		485.76
MED/LCday5		Cold and shredded konjac200g	sugar-free yoghurt200ml	One boiled egg	red bean porridge250g	Stewed duck with mushroom250g	Garlic and oilseed dish200g		Pan-fried longley fish200g	Salad celery200g	watermelon200g			macadamia nut20g
	Total Energy(Kcal)	72	114	85.8	166.675	284.75	91.48		192.18	64.92	62			133.2		1267.01
	Carbohydrate(g)	6.72	10.6	0.08	33	1.7	4.5		1.86	3.8	13.6			2.77		78.63
	Protein(g)	1.682	6.6	9.68	8.05	17.35	2.88		32.22	2.8	1			1.582		83.844
	Fat(g)	2.2	0.8	8.4	0.35	23.35	6.96		6.22	4.68	0.6			15.154		68.714
	saturated fatty acids(g)	0	0.4	0	0.075	6.1	1.1		0	0	0			2.39		10.065
	cholesterol(mg)	0	36	0	0	102.6	0		0	0	0			0		138.6
MED/LCday6		Cold and shredded konjac200g	Sugar-free soybean milk400ml		mung bean porridge250g	Pan-seared chicken breast200g	Stir-fried vegetables200g		Tomato basa fish200g	Stir-fried broccoli200g	apricot200g			pinenut20g
	Total Energy(Kcal)	72	120		145.95	233.92	98		468	99.1	76			100.6		1413.57
	Carbohydrate(g)	6.72	10.4		25	2.34	6.76		6	6.3	12.6			2.44		78.56
	Protein(g)	1.682	11.6		5.825	47.76	5.44		17.8	4.32	1.8			2.68		98.907
	Fat(g)	2.2	1.92		0.3	4.7	5.82		46.6	7.1	0.2			14.12		82.96
	saturated fatty acids(g)	0	0.72		0.1	1.92	0		0	0	0			1.8		4.54
	cholesterol(mg)	0	0		0	125.4	0		0	0	0			0		125.4
MED/LCday7		graham bread60g	Sugar-free soybean milk400ml		coarse cereal porridge250g	salmon200g	sweet shrimp100g		Steamed cod pieces400g	stir fried snow peas200g	cherry tomato200g			pistachio nuts20g
	Total Energy(Kcal)	152.4	120		102.175	276.08	87		378.48	98.98	50			123.2		1388.32
	Carbohydrate(g)	25.86	10.4		20.75	0.76	0.1		4.8	9.52	11.6			4.38		88.17
	Protein(g)	7.38	11.6		4.25	33.82	19.8		64.44	4.86	2			4.12		144.89
	Fat(g)	2.13	1.92		0	15.32	0.3		11	5.1	0.4			10.6		44.64
	saturated fatty acids(g)	0.438	0.72		0	3.92	0.03		0.32	0	0			1.6		6.59
	cholesterol(mg)	0	0		0	133.34	130		350.76	0	0			0		614.1
